# Supplementary material for: Rational design and synthesis of new acetamide–indole–benzo[ d ]imidazole–carboxylic acid hybrids as dual PTP1B/α-glucosidase inhibitors
Source: Royal Society of Chemistry journal article supplement (doi:10.1039/d5ra07935g), 2026-01-01
Supplement: d5ra07935g1.xlsx [file d5ra07935g1.xlsx]

## Sheet: PTB1B-IC50
			8a
			Conc.	OD Blank	OD Total	OD Final	In (%)
			10	0.02	0.31	0.29	51.6667
			5	0.01	0.39	0.38	36.6667
			2.5	0.03	0.48	0.45	25
			1.25	0.01	0.51	0.5	16.6667
			0.625	0.01	0.58	0.57	5
						IC50	10.2068
			8g
			Conc.	OD Blank	OD Total	OD Final	In (%)
			10	0.03	0.27	0.24	60
			5	0.02	0.34	0.32	46.6667
			2.5	0.01	0.41	0.4	33.3333
			1.25	0.02	0.5	0.48	20
			0.625	0.03	0.6	0.57	5
						IC50	5.92196
			8f
			Conc.	OD Blank	OD Total	OD Final	In (%)
			10	0.04	0.208	0.168	72
			5	0.03	0.28	0.25	58.3333
			2.5	0.02	0.38	0.36	40
			1.25	0.01	0.49	0.48	20
			0.625	0.01	0.57	0.56	6.66667
						IC50	3.86143
			8j
			Conc.	OD Blank	OD Total	OD Final	In (%)
			10	0.1	0.377	0.277	53.8333
			5	0.08	0.4	0.32	46.6667
			2.5	0.07	0.45	0.38	36.6667
			1.25	0.06	0.54	0.48	20
			0.625	0.05	0.61	0.56	6.66667
						IC50	6.70918
			8d
			Conc.	OD Blank	OD Total	OD Final	In (%)
			10	0.09	0.39	0.3	50
			5	0.06	0.37	0.31	48.3333
			2.5	0.03	0.37	0.34	43.3333
			1.25	0.01	0.39	0.38	36.6667
			0.625	0.01	0.41	0.4	33.3333
						IC50	8.14857
			8l
			Conc.	OD Blank	OD Total	OD Final	In (%)
			10	0.05	0.245	0.195	67.5
			5	0.03	0.26	0.23	61.6667
			2.5	0.02	0.31	0.29	51.6667
			1.25	0.02	0.38	0.36	40
			0.625	0.01	0.4	0.39	35
						IC50	2.27733
			8h
			Conc.	OD Blank	OD Total	OD Final	In (%)
			10	0.08	0.303	0.223	62.8333
			5	0.07	0.34	0.27	55
			2.5	0.06	0.38	0.32	46.6667
			1.25	0.06	0.42	0.36	40
			0.625	0.05	0.45	0.4	33.3333
						IC50	3.14008
			Suramin
			Conc.	OD Blank	OD total	OD Final	In (%)
			10	0.094	0.384	0.29	49.827
			5	0.063	0.373	0.31	46.3668
			2.5	0.091	0.431	0.34	41.1765
			1.2	0.066	0.516	0.45	38
			0.6	0.057	0.657	0.6	32
						IC50	10.0074

## Sheet: %Inhibition-PTP1B
				Compund	In (%)
				8a	50
				8b	41
				8c	48
				8d	53
				8e	46
				8f	75
				8g	60
				8h	68
				8i	42
				8j	53
				8k	43
				8l	68
				8m	38
				8n	42
				Suramin	50

## Sheet: Kinetic-PTP1B
					Conc.	1/V0	1/V0.6	1/V1.1	1/V2.2
					0.0133333	35	36	38	40
					0.0266667	36	38	40	42
					0.0533333	39	42	44.1176	48
					0.106667	40	43	48.5	65
					0.213333	46	54	63	85
					0.4	52	73	90	126

## Sheet: %Inhibition-Glucosidase
			Compound	Inhibition (%)
			8a	1
			8b	5
			8c	19
			8d	34
			8e	0
			8f	6
			8g	28
			8h	0
			8i	3
			8j	54
			8k	60
			8l	40
			8m	0
			8n	40
			Acarbose	50

## Sheet: Glucosidase-IC50
				[Compound 8j] (μM)	Repetition 1	Repetition 1	Repetition 1	Mean	SE
				1500	76	74	78	76	2
				1000	65	69	62	65.3333	3.51188
				750	54.4	54.6	54.3	54.4333	0.152753
				550	39	43.4	48.7	43.7	4.85695
				350	25.5	27.7	29.3	27.5	1.90788
				150	2.1	3.4	4.6	3.36667	1.25033
							IC50	659.98	1.26963
				[Compound 8k] (μM)	Repetition 1	Repetition 1	Repetition 1	Mean	SE
				1500	78.2	79.2	83.4	80.2667	2.75923
				1000	72.5	69.3	66.2	69.3333	3.15013
				750	60.6	60.3	60	60.3	0.3
				550	54	52	45	50.3333	4.72582
				350	36.1	31.9	34.7	34.2333	2.13854
				150	10	7.5	12.5	10	2.5
							IC50	551.434	0.94944
				[Acarbose] (μM)	Repetition 1	Repetition 1	Repetition 1	Mean	SE
				1000	54	55.1	56	55.0333	1.00167
				750	50.2	49.78	50	49.9933	0.210079
				550	46.1	44.3	43.2	44.5333	1.46401
				350	32.5	38	39.1	36.5333	3.53601
				150	23.1	20.3	21.6	21.6667	1.40119
				75	9.6	10.9	8	9.5	1.45258
							IC50	750.286	0.675028
